# Supplementary material for: Direct observation of oxygen-vacancy formation and structural changes in Bi2WO6 nanoflakes induced by electron irradiation
Source: publisher site journal article supplement (doi:10.3762/bjnano.10.141), 2019-07-18
Supplement: Additional file 1 [file 2190-4286-10-141-S1.pdf]

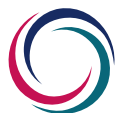

## Supporting Information

for

### **Direct observation of oxygen-vacancy formation and structural changes in Bi<sub>2</sub>WO<sub>6</sub> nanoflakes induced by electron irradiation**

Hong-long Shi, Bin Zou, Zi-an Li, Min-ting Luo and Wen-zhong Wang

*Beilstein J. Nanotechnol.* **2019**, *10*, 1434–1442. doi:10.3762/bjnano.10.141

### **Thickness determination via HRTEM simulation**

The thickness of the  $\text{Bi}_2\text{WO}_6$  nanosheets was determined by HRTEM simulation based on the Bloch-wave method in the Jems software. The crystal structure is from ICSD-67647, the zone axis is [010]. The main simulation parameters were:

illumination model = envelop;

defocus min = 35 nm, step = 1 nm, number = 10;

image dup-x/y = 2, noise% = 2,

start after = 3, number = 18, increment = 3 for iteration parameters

strong parameters = 25, Blochwave parameters: Bethe.

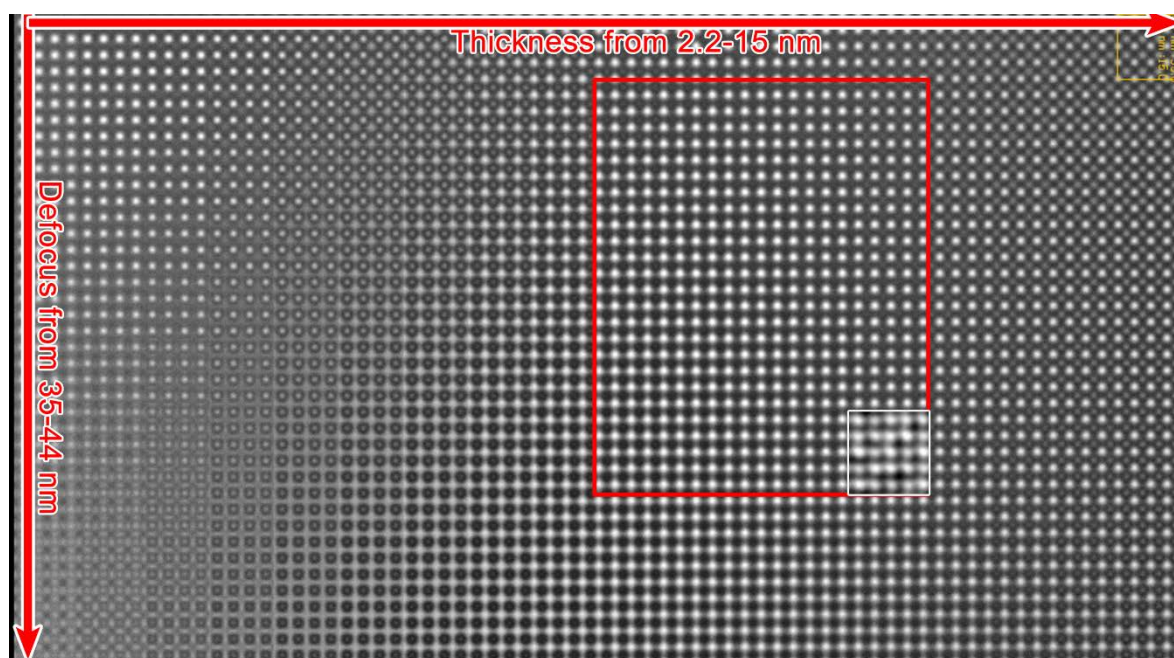

**Figure S1:** Thickness determination of the  $\text{Bi}_2\text{WO}_6$  nanosheet by HRTEM image simulation, where the inset is the experimental HRTEM image, and the matched area is marked by a red frame. It indicates the thickness ranges of 6–14 nm.
